# Supplementary material for: Diagnosing drivers of PM 2.5 simulation biases from meteorology, chemical composition, and emission sources using an efficient machine learning method
Source: Copernicus journal article supplement (doi:10.5194/egusphere-2023-1531), 2023-08-10
Supplement: Supplementary file 1 [file egusphere-2023-1531-supplement.pdf]

1 **Diagnosing drivers of PM<sub>2.5</sub> simulation biases from meteorology,**  
2 **chemical composition, and emission sources using an efficient**  
3 **machine learning method**

4 Shuai Wang<sup>1</sup>, Mengyuan Zhang<sup>1</sup>, Yueqi Gao<sup>1</sup>, Peng Wang<sup>2,3</sup>, Qingyan Fu<sup>4</sup>, Hongliang Zhang<sup>1,3,5</sup>

5 <sup>1</sup>Department of Environmental Science and Engineering, Fudan University, Shanghai 200438, China

6 <sup>2</sup>Department of Atmospheric and Oceanic Sciences, and Institute of Atmospheric Sciences, Fudan University, Shanghai,  
7 200438, China

8 <sup>3</sup>IRDR ICoE on Risk Interconnectivity and Governance on Weather/Climate Extremes Impact and Public Health, Fudan  
9 University, Shanghai, China;

10 <sup>4</sup>Shanghai Environmental Monitoring Center, Shanghai 200235, China

11 <sup>5</sup>Institute of Eco-Chongming (IEC), Shanghai 200062, China

12 *Correspondence to:* Hongliang Zhang (zhanghl@fudan.edu.cn)

Figure

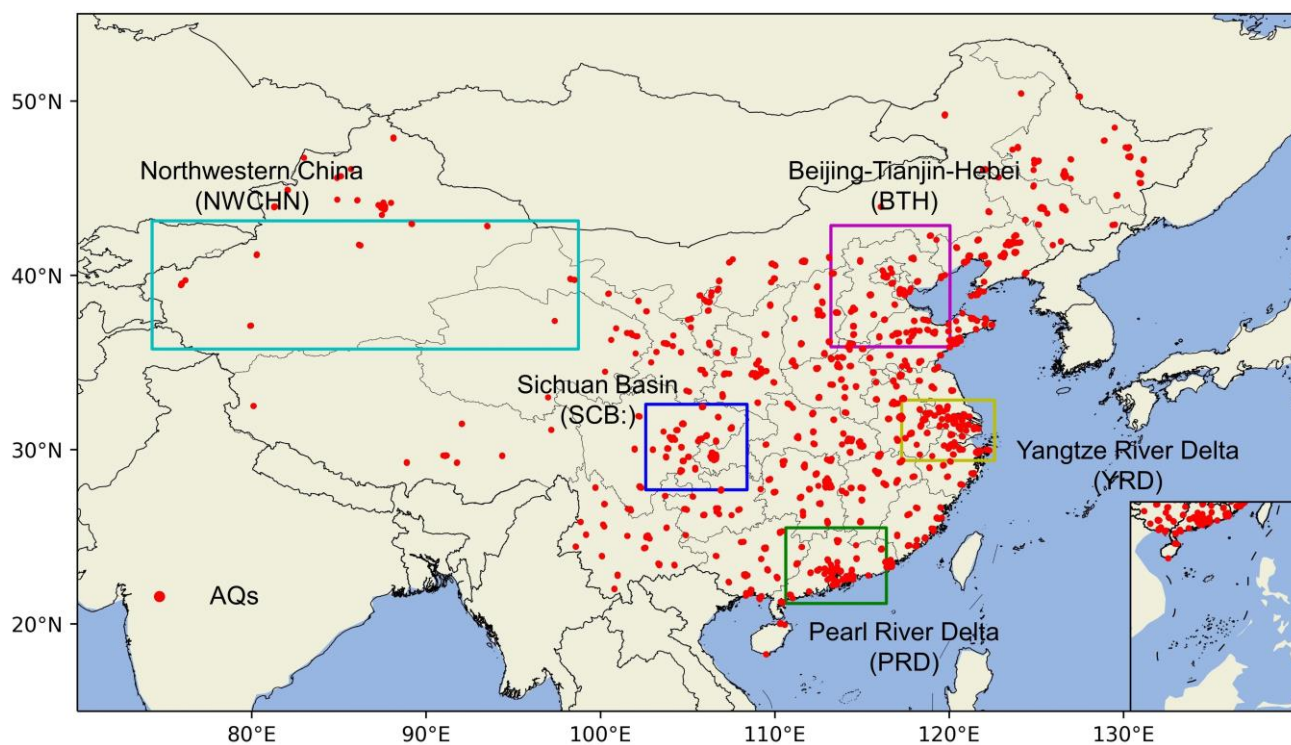

Figure S1. Location of observation sites and five key regions in China, AQs: air quality sites.

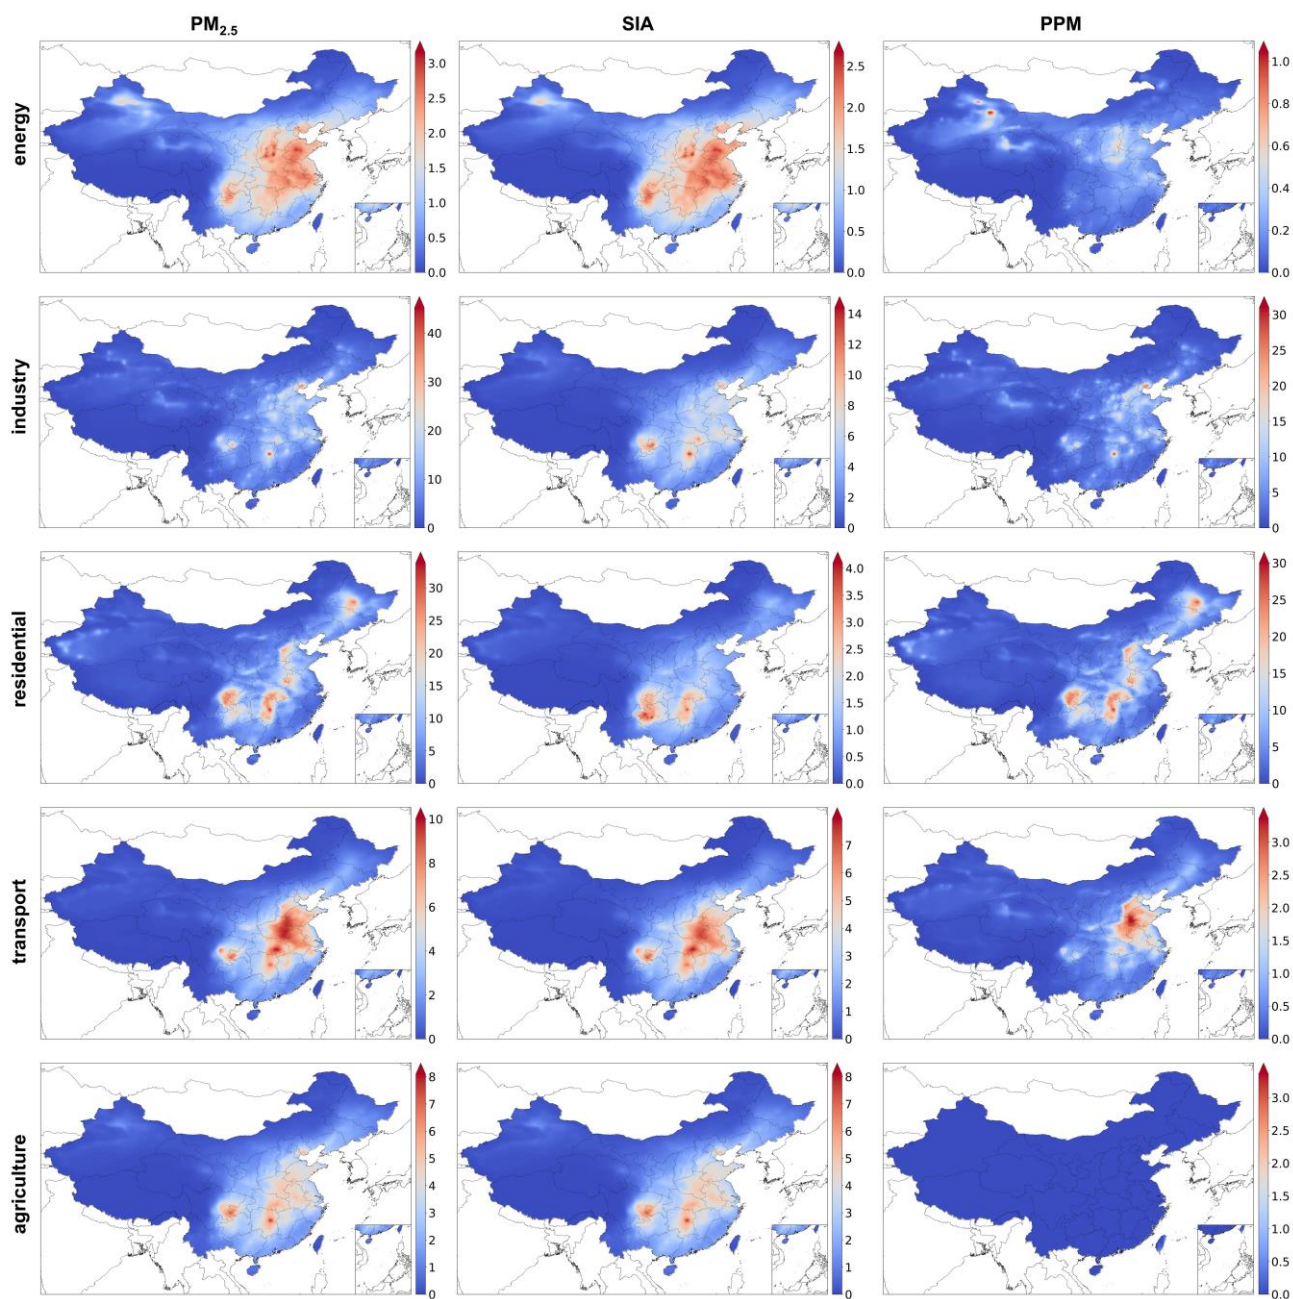

Figure S2. Annual average contributions ( $\mu\text{g}/\text{m}^3$ ) from different sources to PM<sub>2.5</sub>, PPM, and SIA in China.

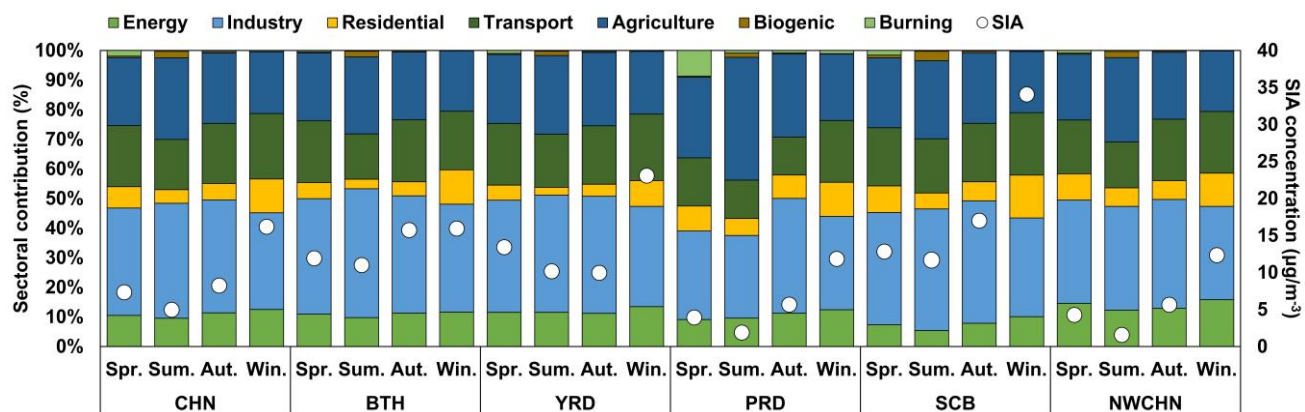

Figure S3. Seasonal average fractional contributions from different sources to secondary PM<sub>2.5</sub> concentration (white circle on the right-hand axis) in China and five regions.

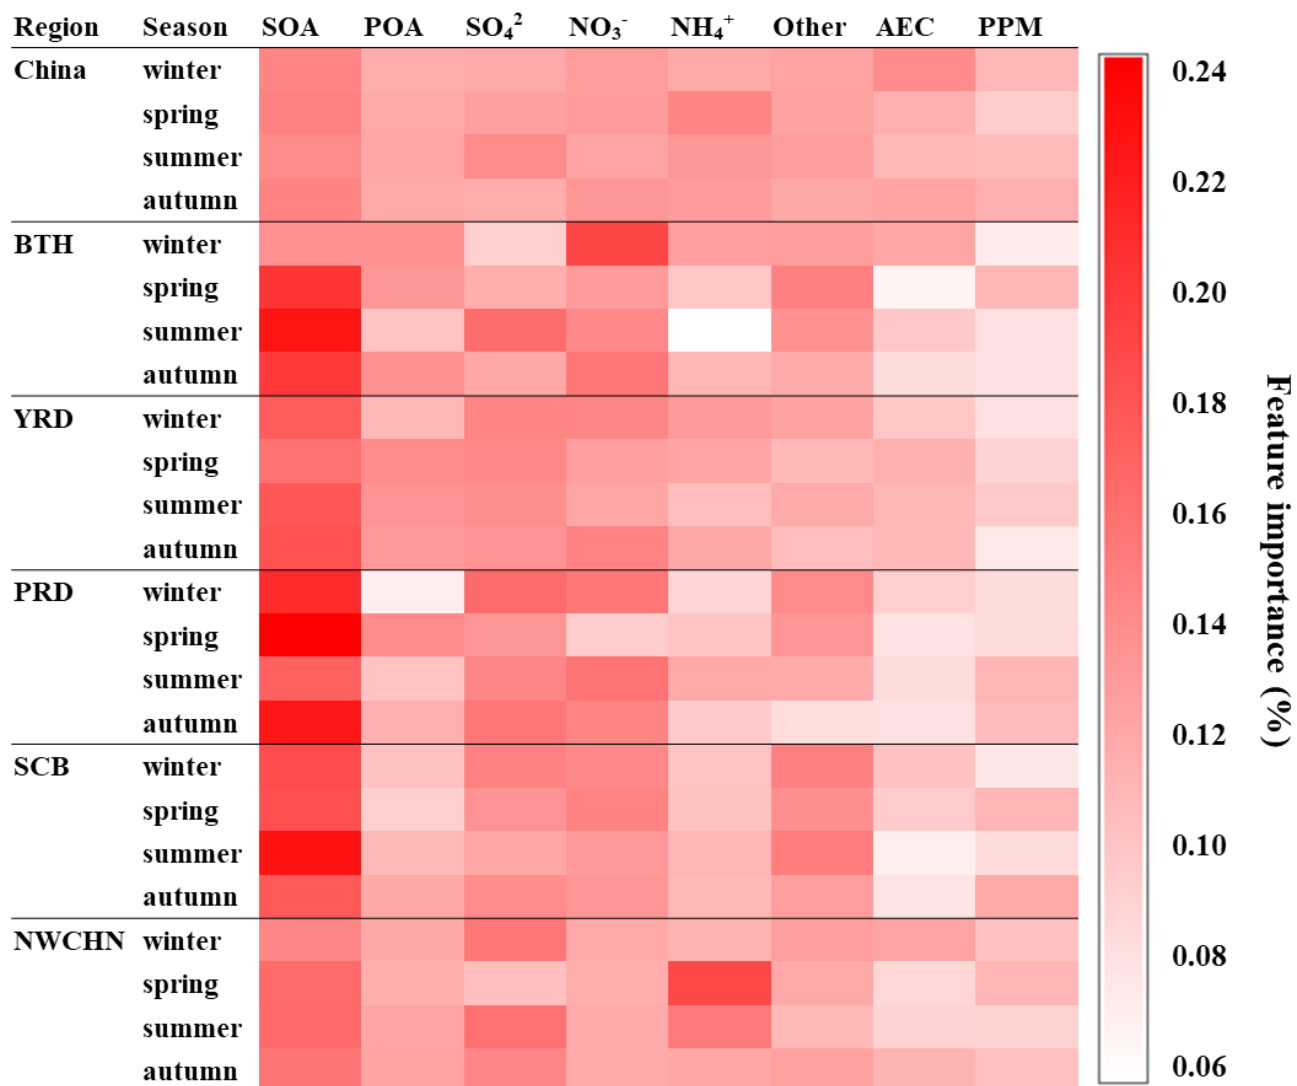

Figure S4. Contribution (%) of each PM<sub>2.5</sub> components to CMAQ simulation biases by region and season.

**Table**

**Table S1. Summary of the WRF model variables used in this study.**

| Variable | Description                     | Spatial Resolution | Temporal Resolution |
|----------|---------------------------------|--------------------|---------------------|
| PRSFC    | surface pressure                | 36 km × 36 km      | daily               |
| PBL      | Planetary boundary layer height |                    |                     |
| TEMP2    | temperature at 2 m              |                    |                     |
| RH       | relative humidity at 2 m        |                    |                     |
| WSPD10   | wind speed at 10 m              |                    |                     |
| WDIR10   | wind direction at 10 m          |                    |                     |
| CFRAC    | total cloud fraction            |                    |                     |
| SOIM     | volumetric soil moisture in top |                    |                     |
| GLW      | longwave radiation at ground    |                    |                     |
| RSTOMI   | bulk stomatal resistance        |                    |                     |

**Table S2. The CMAQ model performance in China and key regions in 2019 with a spatial resolution of 36 km (OBS is mean observation; PRE is mean prediction; MNB is mean normalized bias; MNE is mean normalized error; MFB is mean fractional bias; MFE is mean fractional error.**

| Region | Index | Jan   | Feb   | Mar   | Apr   | May   | Jun   | Jul         | Aug         | Sep   | Oct         | Nov   | Dec   | Criteria |
|--------|-------|-------|-------|-------|-------|-------|-------|-------------|-------------|-------|-------------|-------|-------|----------|
| China  | OBS   | 66.68 | 64.93 | 57.97 | 48.88 | 41.93 | 42.08 | 39.46       | 28.74       | 37.20 | 45.28       | 47.76 | 54.37 |          |
|        | PRE   | 44.79 | 38.93 | 38.06 | 24.57 | 23.91 | 29.56 | 25.76       | 26.01       | 35.02 | 36.38       | 42.47 | 50.97 |          |
|        | MNB   | -0.12 | -0.18 | -0.22 | -0.41 | -0.34 | -0.16 | -0.27       | 0.00        | 0.01  | -0.09       | 0.00  | 0.19  | ≤±0.6    |
|        | MNE   | 0.41  | 0.44  | 0.40  | 0.47  | 0.47  | 0.56  | 0.43        | 0.48        | 0.36  | 0.35        | 0.35  | 0.48  | ≤0.75    |
|        | MFB   | -0.27 | -0.34 | -0.36 | -0.61 | -0.53 | -0.41 | -0.43       | -0.18       | -0.10 | -0.20       | -0.09 | 0.03  |          |
|        | MFE   | 0.47  | 0.53  | 0.49  | 0.66  | 0.61  | 0.64  | 0.54        | 0.49        | 0.36  | 0.40        | 0.35  | 0.42  |          |
| BTH    | OBS   | 87.55 | 83.38 | 56.34 | 48.20 | 38.08 | 38.92 | 36.17       | 27.40       | 35.70 | 45.14       | 52.12 | 65.04 |          |
|        | PRE   | 57.85 | 48.95 | 39.29 | 26.51 | 25.16 | 30.13 | 27.07       | 30.18       | 37.74 | 38.12       | 47.53 | 60.93 |          |
|        | MNB   | -0.19 | -0.25 | -0.22 | -0.37 | -0.23 | -0.09 | -0.18       | 0.25        | 0.14  | -0.04       | 0.01  | 0.14  | ≤±0.6    |
|        | MNE   | 0.42  | 0.43  | 0.37  | 0.44  | 0.44  | 0.53  | 0.41        | 0.62        | 0.42  | 0.38        | 0.38  | 0.49  | ≤0.75    |
|        | MFB   | -0.34 | -0.41 | -0.34 | -0.55 | -0.39 | -0.31 | -0.32       | -0.01       | 0.01  | -0.15       | -0.10 | -0.03 |          |
|        | MFE   | 0.51  | 0.54  | 0.45  | 0.60  | 0.53  | 0.57  | 0.48        | 0.51        | 0.37  | 0.40        | 0.37  | 0.45  |          |
| YRD    | OBS   | 68.03 | 54.49 | 50.08 | 38.69 | 32.48 | 28.07 | 24.63       | 23.69       | 27.80 | 39.41       | 40.68 | 55.27 |          |
|        | PRE   | 49.19 | 42.16 | 36.92 | 31.49 | 23.86 | 28.31 | 26.30       | 29.65       | 22.63 | 28.77       | 28.86 | 48.51 |          |
|        | MNB   | -0.17 | -0.05 | -0.18 | -0.12 | -0.22 | 0.14  | 0.14        | 0.25        | -0.16 | -0.22       | -0.24 | -0.05 | ≤±0.6    |
|        | MNE   | 0.45  | 0.45  | 0.38  | 0.43  | 0.39  | 0.56  | 0.50        | 0.56        | 0.37  | 0.37        | 0.37  | 0.38  | ≤0.75    |
|        | MFB   | -0.35 | -0.22 | -0.31 | -0.27 | -0.35 | -0.09 | -0.04       | 0.05        | -0.28 | -0.35       | -0.36 | -0.17 |          |
|        | MFE   | 0.53  | 0.47  | 0.45  | 0.47  | 0.48  | 0.48  | 0.46        | 0.46        | 0.44  | 0.47        | 0.46  | 0.41  |          |
| PRD    | OBS   | 45.08 | 24.55 | 27.90 | 22.52 | 19.67 | 13.48 | 17.73       | 21.59       | 28.73 | 35.47       | 40.74 | 41.85 |          |
|        | PRE   | 34.40 | 21.08 | 24.31 | 24.65 | 17.06 | 12.78 | 12.18       | 20.20       | 22.93 | 25.64       | 25.27 | 31.88 |          |
|        | MNB   | -0.05 | 0.06  | -0.06 | 0.24  | -0.09 | 0.02  | -0.31       | 0.01        | -0.11 | -0.21       | -0.33 | -0.08 | ≤±0.6    |
|        | MNE   | 0.52  | 0.48  | 0.35  | 0.45  | 0.34  | 0.34  | 0.35        | 0.42        | 0.41  | 0.39        | 0.38  | 0.45  | ≤0.75    |
|        | MFB   | -0.25 | -0.11 | -0.16 | 0.10  | -0.18 | -0.07 | -0.41       | -0.12       | -0.23 | -0.33       | -0.46 | -0.24 |          |
|        | MFE   | 0.53  | 0.46  | 0.38  | 0.35  | 0.37  | 0.34  | 0.44        | 0.42        | 0.45  | 0.45        | 0.50  | 0.48  |          |
| SCB    | OBS   | 78.16 | 53.53 | 44.85 | 33.25 | 33.35 | 23.35 | 19.99       | 24.43       | 28.15 | 25.02       | 38.87 | 63.99 |          |
|        | PRE   | 98.44 | 60.28 | 43.83 | 31.03 | 29.49 | 40.63 | 32.93       | 38.19       | 36.02 | 34.38       | 56.15 | 80.33 |          |
|        | MNB   | 0.38  | 0.30  | 0.10  | 0.01  | -0.01 | 1.07  | <b>0.82</b> | <b>0.75</b> | 0.50  | 0.59        | 0.59  | 0.41  | ≤±0.6    |
|        | MNE   | 0.56  | 0.49  | 0.47  | 0.35  | 0.44  | 1.24  | <b>0.95</b> | <b>0.93</b> | 0.72  | <b>0.77</b> | 0.73  | 0.61  | ≤0.75    |
|        | MFB   | 0.19  | 0.14  | -0.06 | -0.09 | -0.16 | 0.40  | 0.38        | 0.32        | 0.20  | 0.28        | 0.32  | 0.19  |          |
|        | MFE   | 0.42  | 0.38  | 0.44  | 0.36  | 0.45  | 0.63  | 0.56        | 0.56        | 0.49  | 0.50        | 0.49  | 0.44  |          |
| NWCHN  | OBS   | 89.32 | 74.70 | 50.50 | 36.88 | 41.38 | 22.87 | 24.54       | 23.51       | 23.88 | 33.08       | 53.19 | 75.09 |          |
|        | PRE   | 27.28 | 31.38 | 19.98 | 13.81 | 11.65 | 11.99 | 12.01       | 13.05       | 16.17 | 15.18       | 23.12 | 29.29 |          |
|        | MNB   | -0.61 | -0.48 | -0.46 | -0.51 | -0.55 | -0.37 | -0.31       | -0.26       | -0.20 | -0.39       | -0.42 | -0.46 | ≤±0.6    |
|        | MNE   | 0.66  | 0.55  | 0.57  | 0.57  | 0.59  | 0.51  | 0.45        | 0.51        | 0.47  | 0.51        | 0.56  | 0.60  | ≤0.75    |
|        | MFB   | -1.00 | -0.78 | -0.75 | -0.79 | -0.87 | -0.59 | -0.49       | -0.47       | -0.39 | -0.63       | -0.70 | -0.79 |          |
|        | MFE   | 1.03  | 0.83  | 0.82  | 0.83  | 0.90  | 0.69  | 0.60        | 0.63        | 0.57  | 0.72        | 0.78  | 0.88  |          |

$$MNB = \frac{\sum_{i=1}^N (P_i - O_i)}{\sum_{i=1}^N O_i}$$

$$\text{MNE} = \frac{\sum_{i=1}^N |P_i - O_i|}{\sum_{i=1}^N O_i}$$

$$\text{MFB} = \frac{1}{N} \sum_{i=1}^N \frac{(P_i - O_i)}{(P_i + O_i)/2}$$

$$\text{MFE} = \frac{1}{N} \sum_{i=1}^N \frac{|P_i - O_i|}{(P_i + O_i)/2}$$

\* i represents the pairing of N observations O and predictions P by site and time.

**Table S3. Meteorological Model performance in China 2019 (OBS is mean observation; PRE is mean prediction; MB is mean bias; GE is gross error; and RMSE is root mean square error). The value that do not meet the benchmark are shown as bold.**

|                        |      | Jan           | Feb           | Mar          | Apr          | May          | Jun          | Jul          | Aug           | Sep           | Oct           | Nov           | Dec           | Benchmark* |
|------------------------|------|---------------|---------------|--------------|--------------|--------------|--------------|--------------|---------------|---------------|---------------|---------------|---------------|------------|
| T2 (K)                 | OBS  | 272.00        | 274.99        | 282.81       | 290.19       | 292.85       | 296.99       | 299.56       | 299.18        | 294.79        | 288.01        | 280.94        | 274.67        |            |
|                        | PRE  | 275.07        | 277.25        | 283.24       | 289.62       | 292.72       | 297.15       | 299.22       | 299.08        | 295.14        | 288.77        | 282.69        | 277.48        |            |
|                        | MB   | <b>3.06</b>   | <b>2.25</b>   | 0.41         | <b>-0.59</b> | -0.15        | 0.14         | -0.36        | -0.12         | 0.34          | <b>0.74</b>   | <b>1.73</b>   | <b>2.80</b>   | ≤±0.5      |
|                        | GE   | <b>5.36</b>   | <b>5.67</b>   | <b>5.04</b>  | <b>4.78</b>  | <b>4.89</b>  | <b>4.86</b>  | <b>4.70</b>  | <b>4.53</b>   | <b>4.47</b>   | <b>4.36</b>   | <b>4.54</b>   | <b>5.05</b>   | ≤2.0       |
|                        | RMSE | 6.89          | 7.31          | 7.05         | 6.65         | 6.82         | 6.74         | 6.79         | 6.41          | 6.15          | 5.93          | 5.94          | 6.49          |            |
| WS (ms <sup>-1</sup> ) | OBS  | 3.09          | 3.30          | 3.34         | 3.54         | 3.54         | 3.42         | 3.24         | 3.26          | 3.18          | 3.29          | 3.26          | 2.92          |            |
|                        | PRE  | 4.47          | 4.51          | 4.55         | 4.55         | 4.57         | 4.17         | 4.21         | 4.25          | 4.22          | 4.55          | 4.63          | 4.50          |            |
|                        | MB   | <b>1.39</b>   | <b>1.20</b>   | <b>1.21</b>  | <b>1.01</b>  | <b>1.03</b>  | <b>0.75</b>  | <b>0.96</b>  | <b>0.99</b>   | <b>1.03</b>   | <b>1.26</b>   | <b>1.37</b>   | <b>1.59</b>   | ≤±0.5      |
|                        | GE   | <b>2.20</b>   | <b>2.13</b>   | <b>2.14</b>  | <b>2.08</b>  | <b>2.15</b>  | <b>2.01</b>  | 1.97         | 2.00          | <b>2.04</b>   | <b>2.19</b>   | <b>2.27</b>   | <b>2.33</b>   | ≤2.0       |
|                        | RMSE | <b>2.91</b>   | <b>2.81</b>   | <b>2.76</b>  | <b>2.65</b>  | <b>2.76</b>  | <b>2.57</b>  | <b>2.58</b>  | <b>2.63</b>   | <b>2.67</b>   | <b>2.85</b>   | <b>2.95</b>   | <b>3.04</b>   | ≤2.0       |
| WD (°)                 | OBS  | 167.32        | 147.60        | 164.78       | 160.21       | 170.01       | 167.11       | 168.12       | 154.88        | 151.97        | 164.15        | 171.68        | 176.45        |            |
|                        | PRE  | 144.64        | 131.84        | 162.14       | 157.96       | 163.20       | 162.35       | 168.64       | 137.28        | 127.28        | 142.09        | 147.78        | 157.83        |            |
|                        | MB   | <b>-16.11</b> | <b>-10.59</b> | -3.42        | -2.56        | -5.13        | -3.81        | 1.81         | <b>-10.41</b> | <b>-14.39</b> | <b>-17.22</b> | <b>-18.44</b> | <b>-12.78</b> | ≤±10       |
|                        | GE   | <b>74.45</b>  | <b>67.43</b>  | <b>73.59</b> | <b>72.09</b> | <b>73.60</b> | <b>77.26</b> | <b>75.04</b> | <b>74.95</b>  | <b>71.70</b>  | <b>73.80</b>  | <b>72.70</b>  | <b>74.10</b>  | ≤±30       |
|                        | RMSE | 92.25         | 86.05         | 90.23        | 88.83        | 90.19        | 93.33        | 91.69        | 91.10         | 88.07         | 90.90         | 90.22         | 91.84         |            |
| RH (%)                 | OBS  | 82.22         | 82.04         | 73.75        | 67.41        | 62.01        | 61.95        | 60.03        | 60.34         | 63.45         | 70.50         | 72.80         | 76.99         |            |
|                        | PRE  | 77.23         | 81.01         | 76.17        | 69.82        | 61.49        | 61.40        | 61.89        | 61.40         | 61.27         | 67.06         | 69.54         | 76.26         |            |
|                        | MB   | -5.00         | -1.03         | 2.41         | 2.41         | -0.53        | -0.55        | 1.86         | 1.06          | -2.18         | -3.44         | -3.26         | -0.73         |            |
|                        | GE   | 11.85         | 12.17         | 14.94        | 17.04        | 19.40        | 16.85        | 14.99        | 16.20         | 18.34         | 17.37         | 17.28         | 13.32         |            |
|                        | RMSE | 15.05         | 15.46         | 19.32        | 22.23        | 24.91        | 22.23        | 19.83        | 21.11         | 23.15         | 22.24         | 21.89         | 17.09         |            |

Note: \* are benchmarks limits suggested by (Emery et al., 2001)

The formulas used in the table are as follows:

$$\text{MB} = \frac{1}{N} \sum_{i=1}^N (P_i - O_i)$$

$$\text{GE} = \frac{1}{N} \sum_{i=1}^N |P_i - O_i|$$

$$\text{RMSE} = \left[ \frac{1}{N} \sum_{i=1}^N (P_i - O_i)^2 \right]^{1/2}$$

\* i represents the pairing of N observations O and predictions P by site and time.

**Table S4. CMAQ simulation bias under dry and wet days in China and key regions, unit:  $\mu\text{g}/\text{m}^3$ . L1: dry days (RH < 60 %); L1: wet days (RH > 80 %)**

| region | winter | spring | summer | autumn |
|--------|--------|--------|--------|--------|
|--------|--------|--------|--------|--------|

|       | L <sub>1</sub> | L <sub>2</sub> |
|-------|----------------|----------------|----------------|----------------|----------------|----------------|----------------|----------------|
| China | -27.87         | 2.34           | -14.56         | 1.24           | -7.09          | 3.93           | -7.11          | -0.79          |
| BTH   | -22.86         | 12.90          | -13.64         | -6.57          | -4.74          | 1.10           | -1.66          | 5.08           |
| YRD   | -6.46          | -6.23          | -6.94          | -3.40          | -2.83          | 5.39           | -7.09          | -3.23          |
| PRD   | -2.77          | -9.54          | -21.55         | -0.84          | -6.34          | -3.56          | -15.21         | -5.18          |
| SCB   | 4.17           | 38.71          | 0.17           | 0.02           | -2.07          | 29.41          | -12.76         | 20.22          |
| NWCHN | -44.64         | -52.98         | -27.29         | -20.14         | -14.06         | -5.83          | -22.72         | -8.30          |

**Table S5. Contribution (%) of each sectoral source to CMAQ simulation biases by region and season. PM<sub>2.5\_res</sub>: residential, PM<sub>2.5\_ene</sub>: energy, PM<sub>2.5\_tra</sub>: transportation, PM<sub>2.5\_arg</sub>: agriculture, PM<sub>2.5\_ind</sub>: industry, Other: other PM<sub>2.5</sub> components.**

| region | PM <sub>2.5_res</sub> | PM <sub>2.5_ene</sub> | PM <sub>2.5_tra</sub> | PM <sub>2.5_arg</sub> | PM <sub>2.5_ind</sub> | EC   | Other |
|--------|-----------------------|-----------------------|-----------------------|-----------------------|-----------------------|------|-------|
| BTH    | 0.20                  | 0.16                  | 0.14                  | 0.13                  | 0.10                  | 0.14 | 0.12  |
| china  | 0.16                  | 0.16                  | 0.14                  | 0.14                  | 0.13                  | 0.13 | 0.14  |
| FWP    | 0.18                  | 0.18                  | 0.13                  | 0.12                  | 0.12                  | 0.14 | 0.14  |
| NWCHN  | 0.18                  | 0.15                  | 0.12                  | 0.15                  | 0.13                  | 0.13 | 0.14  |
| PRD    | 0.17                  | 0.14                  | 0.14                  | 0.13                  | 0.13                  | 0.14 | 0.15  |
| SCB    | 0.16                  | 0.15                  | 0.16                  | 0.14                  | 0.12                  | 0.13 | 0.13  |
| YRD    | 0.18                  | 0.16                  | 0.15                  | 0.13                  | 0.12                  | 0.14 | 0.12  |

## Reference

Emery, C., Tai, E., and Yarwood, G.: Enhanced meteorological modeling and performance evaluation for two Texas ozone episodes, Prepared for the Texas natural resource conservation commission, by ENVIRON International Corporation, 2001.
